# Supplementary material for: Distinguishing between Thymic Epithelial Tumors and Benign Cysts via Computed Tomography
Source: PubMed Central journal article supplement — Korean J Radiol. 2019 Mar 11;20(4):671–82. doi: 10.3348/kjr.2018.0400 (PMC6424822; doi:10.3348/kjr.2018.0400), 2019-03-11
Supplement: kjr-20-671-s001.pdf [file kjr-20-671-s001.pdf]

**Supplementary Table 1. Distribution of World Health Organization Histological Subtype of Thymic Epithelial Tumors**

| A      | AB       | B1       | B2       | B3       | Thymic Carcinoma | Total |
|--------|----------|----------|----------|----------|------------------|-------|
| 2 (2%) | 28 (21%) | 35 (27%) | 20 (15%) | 13 (10%) | 34 (26%)         | 132   |
