# Supplementary material for: Distinguishing between Thymic Epithelial Tumors and Benign Cysts via Computed Tomography
Source: PubMed Central journal article supplement — Korean J Radiol. 2019 Mar 11;20(4):671–82. doi: 10.3348/kjr.2018.0400 (PMC6424822; doi:10.3348/kjr.2018.0400), 2019-03-11
Supplement: kjr-20-671-s002.pdf [file kjr-20-671-s002.pdf]

**Supplementary Table 2-1. Results of Subgroup Multivariate Logistic Regression Analysis for Low Risk Thymomas Subgroup (n = 22) vs. Cysts (n = 45), including Either (a) Presence of Protrusion or (b) Protrusion Ratio**

| CT Findings                       | Odds Ratio | 95% Confidence Interval | P       |
|-----------------------------------|------------|-------------------------|---------|
| <b>(a)*</b>                       |            |                         |         |
| Presence of protrusion            | 81.862     | 7.043–951.481           | < 0.001 |
| Post-contrast attenuation ≥ 60 HU | 76.469     | 4.614–1267.301          | 0.003   |
| <b>(b)*</b>                       |            |                         |         |
| Protrusion ratio ≥ 13%            | 52.209     | 3.327–819.335           | 0.005   |
| Post-contrast attenuation ≥ 60 HU | 184.031    | 4.785–7078.22           | 0.005   |
| Lobulated contour                 | 22.229     | 1.321–374.206           | 0.031   |

Low risk thymomas subgroup includes type A, AB, and B1. \*Other variables were removed from analysis using backward enter model, in which variables that show low significance level with *p* value larger than 0.1 are removed from regression model. HU = Hounsfield unit

**Supplementary Table 2-2. Sensitivity and Specificity of Significant CT Findings for Discriminating Low Risk Thymomas Subgroup (n = 22) From Cysts (n = 45)**

| CT Findings                       | Sensitivity (%) | Specificity (%) |
|-----------------------------------|-----------------|-----------------|
| Presence of protrusion            | 91              | 91              |
| Protrusion ratio ≥ 13%            | 87              | 91              |
| Post-contrast attenuation ≥ 60 HU | 95              | 82              |

Low risk thymomas subgroup includes type A, AB, and B1.
